# Supplementary material for: A facile synthesis of CoFe2O4/biocarbon nanocomposites as efficient bi-functional electrocatalysts for the oxygen reduction and oxygen evolution reaction
Source: Royal Society of Chemistry journal article supplement (doi:10.1039/c4ta04115a), 2014-01-01
Supplement: c4ta04115a1.pdf [file c4ta04115a1.pdf]

## Supporting Information

### A Facile Biosynthesis of $\text{CoFe}_2\text{O}_4$ /Carbon Nanocomposites as Efficient Bi-functional Electrocatalysts for Oxygen Reduction and Oxygen Evolution

#### Reaction

Shanshan Liu<sup>a,b</sup>, Weiyong Bian<sup>b</sup>, Zhenrong Yang<sup>b</sup>, Jinghua Tian<sup>b</sup>, Chao Jin<sup>b</sup>, Ming Shen<sup>c</sup>, Zhufa

Zhou<sup>a,\*</sup>, and Ruizhi Yang<sup>b,\*</sup>

<sup>a</sup> College of Chemistry, Chemical Engineering and Materials Science, Suzhou Jiangsu 215006, China.

<sup>b</sup> College of Physics, Optoelectronics and Energy & Collaborative Innovation Center of Suzhou Nano Science and Technology, Suzhou Jiangsu 215006, China.

<sup>c</sup> Huasheng Chemical Corporation, Zhangjiagang, Jiangsu 215635, China

E-mail: yangrz@suda.edu.cn; zfzhou@suda.edu.cn

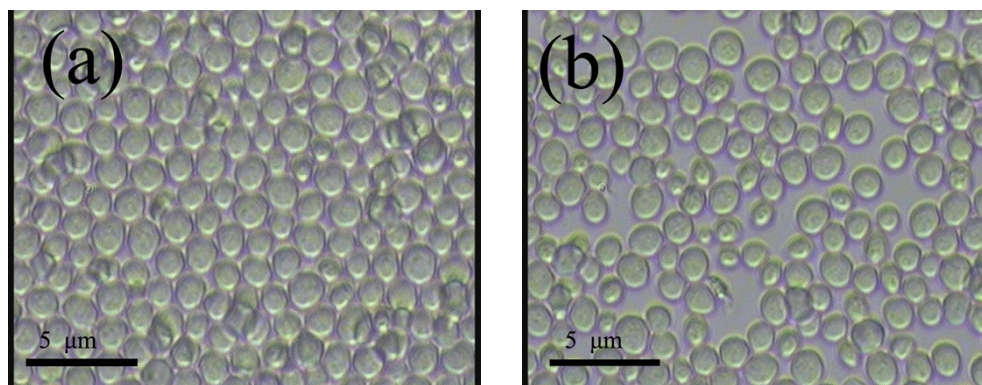

**Figure S1.** Optical microscope images of (a) cultivated yeast cells and (b) yeast cells after being added to  $\text{Co}^{2+}$  and  $\text{Fe}^{3+}$ .

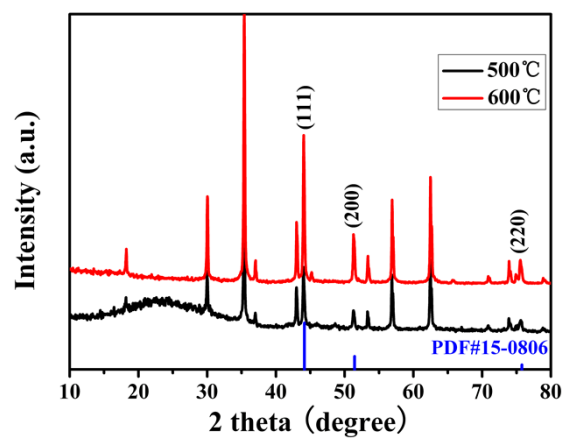

**Figure S2.** XRD patterns of CFO/BC pyrolyzed at 500° C and 600° C.

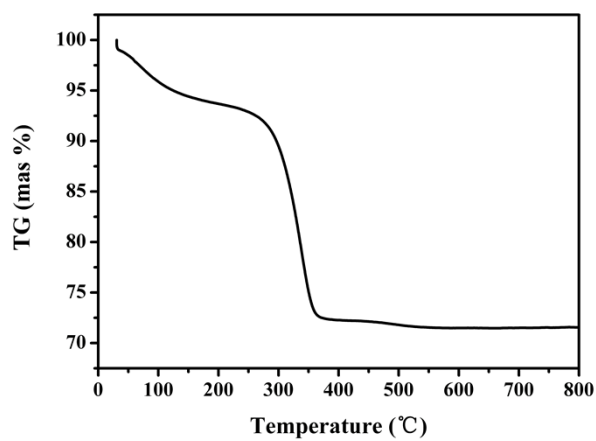

**Figure S3.** TGA curve of CFO/BC in air atmosphere.

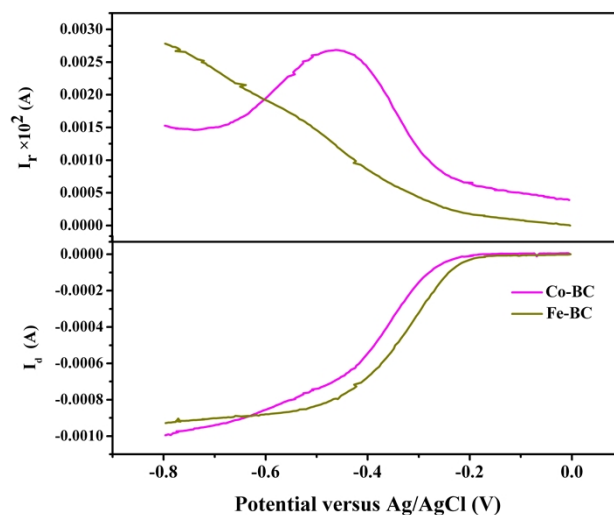

**Figure S4.** Linear sweeping voltammograms (LSVs) on rotating ring-disk electrode for Co/BC (only  $\text{Co}(\text{NO}_3)_2$  was added into the yeast emulsion and the other experiment conditions were the same) and Fe/BC (only  $\text{Fe}(\text{NO}_3)_3$  was added into the yeast emulsion and the other experiment conditions were the same) in  $\text{O}_2$ -saturated 0.1 M KOH at a rotating speed of 1600 rpm. The disk potential was scanned at  $10 \text{ mV s}^{-1}$  and the ring potential was fixed at 0.5 V (vs. Ag/AgCl).

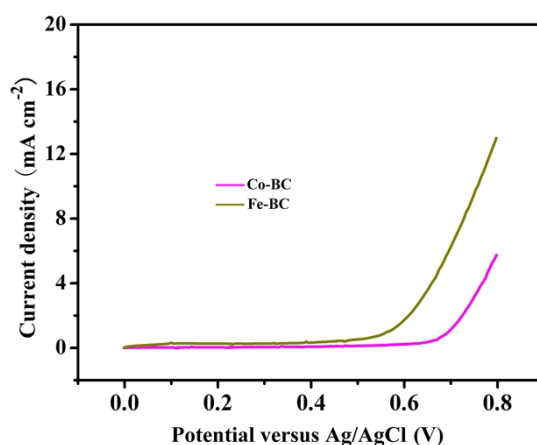

**Figure S5.** LSVs for the Co/BC and Fe/BC in  $\text{N}_2$ -saturated 0.1 M KOH with a sweeping rate of  $10 \text{ mV s}^{-1}$  and a rotating speed of 1600 rpm
